# Supplementary material for: Ruminant-Waste Protein Hydrolysates and Their Derivatives as a Bio-Flocculant for Oil Sands Tailing Management
Source: MDPI journal article supplement (doi:10.3390/polym13203533), 2021-10-14
Supplement: s1 [file s1]

Supplemental Materials:

# Ruminant-Waste Protein Hydrolysates and Their Derivatives as a Bio-Flocculant for Oil Sands Tailing Management

Jesse Yuzik <sup>1</sup>, Vinay Khatri <sup>1</sup>, Michael Chae <sup>1</sup>, Paolo Mussone <sup>2</sup> and David C. Bressler <sup>1,\*</sup>

<sup>1</sup> Department of Agricultural, Food and Nutritional Science, Faculty of Agricultural, Life and Environmental Sciences, University of Alberta, Edmonton, AB T6G 2P5, Canada; yuzik@ualberta.ca (J.Y.); vkhatri@ualberta.ca (V.K.); mchae@ualberta.ca (M.C.)

<sup>2</sup> Applied BioNanotechnology Industrial Research Chair, Industry Solutions, Northern Alberta Institute of Technology, 10210 Princess Elizabeth Ave., NW, Edmonton, AB T5G 0Y2, Canada; PMUSSONE@nait.ca

\* Correspondence: dbressle@ualberta.ca

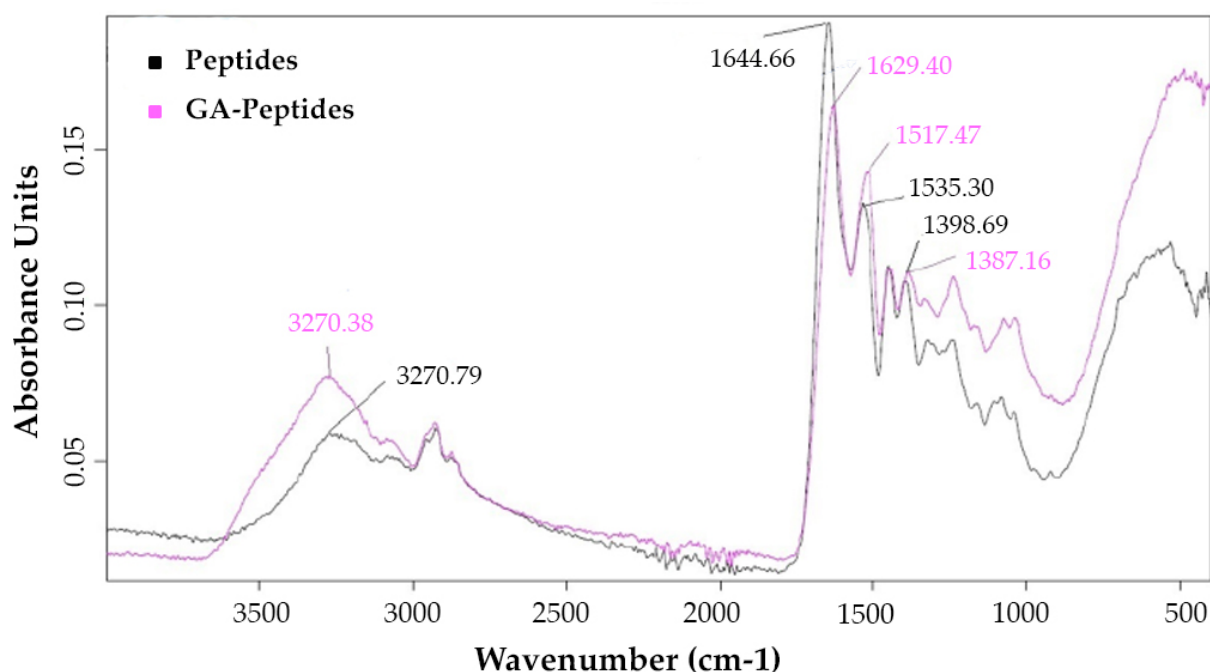

**Figure S1.** Attenuated Total Reflectance (ATR) Fourier-Transform Infrared Spectroscopy (FTIR) spectra of SRM-derived peptides (Peptides) and peptides crosslinked with glutaraldehyde (GA-Peptides; 1:8 ratio).

**Supplemental Table S1.** Percent settling over time in experiments designed to assess the impact of glutaraldehyde cross-linking on the flocculation performance of SRM-derived peptides.

|                | Method Blank | Gypsum Only  | Peptides + Gypsum | GA-Peptides* | GA-Peptides* + Gypsum |
|----------------|--------------|--------------|-------------------|--------------|-----------------------|
| <b>0 min</b>   | 0.00 ± 0.00% | 0.00 ± 0.00% | 0.00 ± 0.00%      | 0.00 ± 0.00% | 0.00 ± 0.00%          |
| <b>5 min</b>   | 0.00 ± 0.00% | 0.00 ± 0.00% | 0.00 ± 0.00%      | 39.8 ± 0.3%  | 25.2 ± 5.3%           |
| <b>10 min</b>  | 0.00 ± 0.00% | 0.00 ± 0.00% | 0.53 ± 0.23%      | 58.4 ± 0.0%  | 49.3 ± 1.2%           |
| <b>15 min</b>  | 0.00 ± 0.00% | 0.13 ± 0.23% | 2.40 ± 0.00%      | 62.4 ± 0.0%  | 54.3 ± 0.6%           |
| <b>30 min</b>  | 0.27 ± 0.23% | 0.53 ± 0.23% | 7.33 ± 1.51%      | 67.4 ± 0.3%  | 60.3 ± 0.6%           |
| <b>45 min</b>  | 0.80 ± 0.00% | 1.33 ± 0.61% | 12.1 ± 2.2%       | 69.8 ± 0.3%  | 63.2 ± 0.8%           |
| <b>60 min</b>  | 0.80 ± 0.00% | 3.33 ± 1.01% | 16.7 ± 3.0%       | 71.2 ± 0.0%  | 65.2 ± 0.7%           |
| <b>120 min</b> | 0.80 ± 0.00% | 15.6 ± 1.2%  | 36.0 ± 5.5%       | 74.2 ± 0.3%  | 69.5 ± 0.6%           |
| <b>180 min</b> | 1.20 ± 0.00% | 31.5 ± 2.0%  | 52.0 ± 6.2%       | 75.8 ± 0.3%  | 71.9 ± 0.6%           |
| <b>24 h</b>    | 3.20 ± 0.00% | 70.8 ± 0.4%  | 77.5 ± 0.6%       | 83.8 ± 0.3%  | 80.9 ± 0.2%           |
| <b>48 h</b>    | 3.73 ± 0.23% | 74.9 ± 0.2%  | 79.7 ± 0.5%       | 86.2 ± 0.3%  | 82.5 ± 0.2%           |

\* Glutaraldehyde crosslinked peptides were obtained using a 1:8 molar ratio (amino:aldehyde groups).

**Supplemental Table S2.** Percent settling over time in experiments designed to assess the flocculation capacity of bioflocculants generated using crosslinking ratios of 1:2 and 1:4 (amino:aldehyde groups).

|                | <b>Method Blank</b> | <b>Gypsum Only</b> | <b>Peptides + Gypsum</b> | <b>1:2 + Gypsum</b> | <b>1:4 + Gypsum</b> |
|----------------|---------------------|--------------------|--------------------------|---------------------|---------------------|
| <b>0 min</b>   | 0.00 ± 0.00%        | 0.00 ± 0.00%       | 0.00 ± 0.00%             | 0.00 ± 0.00%        | 0.00 ± 0.00%        |
| <b>1 min</b>   | 0.00 ± 0.00%        | 0.00 ± 0.00%       | 0.00 ± 0.00%             | 0.00 ± 0.00%        | 0.80 ± 0.00%        |
| <b>2 min</b>   | 0.00 ± 0.00%        | 0.00 ± 0.00%       | 0.00 ± 0.00%             | 0.00 ± 0.00%        | 1.20 ± 0.40%        |
| <b>5 min</b>   | 0.00 ± 0.00%        | 0.00 ± 0.00%       | 0.00 ± 0.00%             | 0.00 ± 0.00%        | 7.47 ± 3.11%        |
| <b>10 min</b>  | 0.00 ± 0.00%        | 0.00 ± 0.00%       | 0.80 ± 0.00%             | 1.73 ± 1.01%        | 30.7 ± 6.4%         |
| <b>15 min</b>  | 0.00 ± 0.00%        | 0.00 ± 0.00%       | 1.33 ± 0.92%             | 4.27 ± 4.69%        | 46.3 ± 3.7%         |
| <b>30 min</b>  | 0.40 ± 0.00%        | 0.80 ± 0.00%       | 6.53 ± 0.83%             | 31.1 ± 4.0%         | 58.9 ± 0.5%         |
| <b>60 min</b>  | 0.80 ± 0.00%        | 3.60 ± 0.69%       | 14.7 ± 0.9%              | 51.5 ± 4.0%         | 65.2 ± 1.1%         |
| <b>120 min</b> | 0.93 ± 0.23%        | 16.4 ± 1.2%        | 32.1 ± 1.8%              | 64.3 ± 1.2%         | 69.1 ± 0.2%         |
| <b>180 min</b> | 1.20 ± 0.00%        | 32.3 ± 1.7%        | 48.1 ± 2.0%              | 65.9 ± 1.2%         | 71.2 ± 0.0%         |
| <b>24 h</b>    | 3.07 ± 0.23%        | 70.9 ± 0.2%        | 76.3 ± 0.9%              | 75.9 ± 0.2%         | 80.5 ± 0.2%         |
| <b>48 h</b>    | 3.87 ± 0.23%        | 75.1 ± 0.2%        | 79.2 ± 0.4%              | 79.5 ± 0.2%         | 82.7 ± 0.2%         |

**Supplemental Table S3.** Percent settling over time in experiments designed to assess the flocculation capacity of biofloc-culants generated using crosslinking ratios of 1:8 and 1:16 (amino:aldehyde groups).

|                | <b>Method Blank</b> | <b>Gypsum Only</b> | <b>Peptides + Gypsum</b> | <b>1:8 + Gypsum</b> | <b>1:16 + Gypsum</b> |
|----------------|---------------------|--------------------|--------------------------|---------------------|----------------------|
| <b>0 min</b>   | 0.00 ± 0.00%        | 0.00 ± 0.00%       | 0.00 ± 0.00%             | 0.00 ± 0.00%        | 0.00 ± 0.00%         |
| <b>1 min</b>   | 0.00 ± 0.00%        | 0.00 ± 0.00%       | 0.00 ± 0.00%             | 1.33 ± 0.23%        | 1.73 ± 0.23%         |
| <b>2 min</b>   | 0.00 ± 0.00%        | 0.00 ± 0.00%       | 0.00 ± 0.00%             | 2.00 ± 0.40%        | 3.73 ± 0.46%         |
| <b>5 min</b>   | 0.00 ± 0.00%        | 0.00 ± 0.00%       | 0.00 ± 0.00%             | 20.8 ± 0.8%         | 34.3 ± 0.6%          |
| <b>10 min</b>  | 0.00 ± 0.00%        | 0.00 ± 0.00%       | 0.53 ± 0.23%             | 48.1 ± 0.6%         | 50.8 ± 1.2%          |
| <b>15 min</b>  | 0.00 ± 0.00%        | 0.13 ± 0.23%       | 2.13 ± 1.22%             | 53.7 ± 0.2%         | 55.1 ± 0.8%          |
| <b>30 min</b>  | 0.53 ± 0.23%        | 0.80 ± 0.00%       | 7.87 ± 0.23%             | 60.3 ± 0.2%         | 60.8 ± 0.8%          |
| <b>60 min</b>  | 0.80 ± 0.00%        | 4.40 ± 0.69%       | 16.9 ± 0.6%              | 65.3 ± 0.5%         | 65.5 ± 0.2%          |
| <b>120 min</b> | 0.80 ± 0.00%        | 15.9 ± 0.2%        | 36.4 ± 1.2%              | 70.4 ± 0.7%         | 69.9 ± 0.5%          |
| <b>180 min</b> | 0.93 ± 0.23%        | 31.3 ± 0.6%        | 52.5 ± 1.2%              | 72.1 ± 0.2%         | 72.1 ± 0.2%          |
| <b>24 h</b>    | 2.93 ± 0.23%        | 71.2 ± 0.0%        | 77.6 ± 0.8%              | 81.3 ± 0.5%         | 81.3 ± 0.9%          |
| <b>48 h</b>    | 3.87 ± 0.23%        | 75.1 ± 0.2%        | 80.0 ± 0.8%              | 84.3 ± 1.8%         | 81.7 ± 0.2%          |

**Supplemental Table S4.** Percent settling over time in experiments designed to assess the flocculation capacity of biofloc-culants generated using crosslinking ratios of 1:32 and 1:64 (amino:aldehyde groups).

|                | Method Blank | Gypsum Only  | Peptides + Gypsum | 1:32 + Gypsum | 1:64 + Gypsum |
|----------------|--------------|--------------|-------------------|---------------|---------------|
| <b>0 min</b>   | 0.00 ± 0.00% | 0.00 ± 0.00% | 0.00 ± 0.00%      | 0.00 ± 0.00%  | 0.00 ± 0.00%  |
| <b>1 min</b>   | 0.00 ± 0.00% | 0.00 ± 0.00% | 0.00 ± 0.00%      | 2.40 ± 0.00%  | 0.67 ± 0.23%  |
| <b>2 min</b>   | 0.00 ± 0.00% | 0.00 ± 0.00% | 0.00 ± 0.00%      | 8.00 ± 0.80%  | 1.07 ± 0.23%  |
| <b>5 min</b>   | 0.00 ± 0.00% | 0.00 ± 0.00% | 0.00 ± 0.00%      | 49.2 ± 0.7%   | 2.00 ± 0.40%  |
| <b>10 min</b>  | 0.00 ± 0.00% | 0.00 ± 0.00% | 0.80 ± 0.00%      | 57.2 ± 0.4%   | 9.47 ± 0.83%  |
| <b>15 min</b>  | 0.00 ± 0.00% | 0.27 ± 0.23% | 3.73 ± 0.46%      | 60.3 ± 0.5%   | 19.5 ± 2.0%   |
| <b>30 min</b>  | 0.53 ± 0.23% | 0.80 ± 0.00% | 11.3 ± 0.6%       | 64.3 ± 0.5%   | 44.8 ± 4.2%   |
| <b>60 min</b>  | 0.80 ± 0.00% | 4.80 ± 0.40% | 23.6 ± 1.1%       | 68.0 ± 0.4%   | 58.8 ± 1.1%   |
| <b>120 min</b> | 0.80 ± 0.00% | 18.7 ± 0.9%  | 49.7 ± 1.8%       | 70.9 ± 0.6%   | 64.5 ± 0.5%   |
| <b>180 min</b> | 0.93 ± 0.23% | 36.3 ± 1.2%  | 61.5 ± 0.6%       | 72.9 ± 0.6%   | 66.9 ± 0.5%   |
| <b>24 h</b>    | 2.93 ± 0.23% | 71.1 ± 0.2%  | 77.7 ± 0.9%       | 80.1 ± 0.2%   | 77.2 ± 0.4%   |
| <b>48 h</b>    | 3.47 ± 0.46% | 75.2 ± 0.0%  | 79.9 ± 0.8%       | 81.6 ± 0.0%   | 79.2 ± 0.0%   |
